# Supplementary material for: Estimation of measurement uncertainty for free drug concentrations using ultrafiltration
Source: publisher site journal article supplement (doi:10.1515/cclm-2025-0736), 2025-06-15
Supplement: Supplementary file 1 [file j_cclm-2025-0736_suppl_001.docx]

Supplementary Material. Combined uncertainty calculation for the unbound phenytoin in serum measured using the law for the propagation of uncertainty considering a non-specific binding effect.

According to the *GUM law for the propagation of uncertainty* [1], the combined standard uncertainty related to the mass concentration of free phenytoin in serum (), ), is given in terms of partial derivatives of concerning each of the inputs and the standard uncertainties of these inputs:

**When the ultrafiltration procedure is used, and a significant bias related to the non-specific binding exists:**

The is defined by the formula:

**Eq. (S1)**

and its :

**Eq. (S2)**

Where is the mass concentration of total (bound+unbound) phenytoin in serum measured before the ultrafiltration procedure; , the mass concentration of total (bound+unbound) phenytoin in serum obtained in the top Centrifree® device after the ultrafiltration procedure;, the mass concentration of phenytoin in the ultrafiltrate obtained in the bottom Centrifree® device after the ultrafiltration procedure; , the top Centrifree® device mass-weighted after serum sample volume addition; , the top Centrifree® device mass-weighted obtained after centrifugation process; , the bottom Centrifree® device mass-weighted obtained after centrifugation process;, the bottom Centrifree® device mass-weighted before serum sample volume addition; , the top Centrifree® device mass-weighted before serum sample volume addition.

For estimating the standard uncertainty of the output we require the following eight partial derivatives:

**Eq. (S3)**

**Eq. (S4)**

**Eq. (S5)**

**Eq. (S6)**

**Eq. (S7)**

**Eq. (S8)**

**Eq. (S9)**

**Eq. (S10)**

The partial derivatives give the sensitivities of regarding the various input quantities. The required in is then given by:

**Eq. (11)**

Dividing both sides by and rearranging terms, we obtain the following simplified equation:

**Eq. (S12)**

Furthermore, if we want to obtain the relative form of the , , considering that:

**Eq. (S13)**

**Eq. (S14)**

**Eq. (S15)**

**Eq. (S16)**

**Eq. (S17)**

**Eq. (S18)**

**Eq. (S19)**

**Eq. (S20)**

and substituting the relative equations **Eqs. (S13−S20)** in **Eq. (S12)**, it becomes in:

**Eq. (S21)**

**Supplementary Table 1. Correlation coefficients between different quantities obtained from 30 paired values.**

| **Correlation coefficient** | **Value** |
| --- | --- |
|  | 0.9789 |
|  | 0.9815 |
|  | 0.0141 |
|  | 0.0241 |
|  | 0.1403 |
|  | 0.1252 |
|  | 0.1774 |
|  | 0.9654 |
|  | 0.0353 |
|  | 0.0115 |
|  | 0.1165 |
|  | 0.0998 |
|  | 0.1504 |
|  | 0.0412 |
|  | 0.0145 |
|  | 0.1059 |
|  | 0.0901 |
|  | 0.1409 |
|  | 0.0254 |
|  | 0.9735 |
|  | 0.9876 |
|  | 0.9583 |
|  | 0.9778 |
|  | 0.9632 |
|  | 0.9661 |
|  | 0.9664 |
|  | 0.9566 |
|  | 0.9616 |

**Reference**

1. Joint Committee for Guides in Metrology, Evaluation of measurement data ⎯ Guide to the expression of uncertainty in measurement; 3rd edition. *Guide JCGM 100*. Sèvres (France): JCGM. Available from: <https://www.bipm.org/utils/common/documents/jcgm/JCGM_100_2008_E.pdf>. [Accessed 11 June 2025], 2008.
